# Supplementary material for: Laser cleavable probes for in situ multiplexed glycan detection by single cell mass spectrometry
Source: PubMed Central journal article supplement — Chem Sci. 2019 Oct 17;10(47):10958–62. doi: 10.1039/c9sc03912k (PMC7066667; doi:10.1039/c9sc03912k), 2019-10-17
Supplement: SC-010-C9SC03912K-s001.pdf [file SC-010-C9SC03912K-s001.pdf]

## Supporting Information for:

### Laser Cleavable Probe for *in-Situ* Multiplexed Glycan Detection by Single Cell Mass Spectrometry

Jing Han,<sup>[a,b]</sup> Xi Huang,<sup>[a]</sup> Huihui Liu,<sup>[a]</sup> Jiyun Wang,<sup>[a]</sup> Caiqiao Xiong\*<sup>[a]</sup> and Zongxiu Nie\*<sup>[a,b,c]</sup>

<sup>[a]</sup> Beijing National Laboratory for Molecular Sciences, Key Laboratory of Analytical Chemistry for Living Biosystems, Institute of Chemistry, Chinese Academy of Sciences, Beijing 100190, China. E-mail: znie@iccas.ac.cn

<sup>[b]</sup> University of the Chinese Academy of Sciences, Beijing 100049, China.

<sup>[c]</sup> National Center for Mass Spectrometry in Beijing, Beijing 100190, China

## Table of contents

|                      |     |
|----------------------|-----|
| 1. Experimental..... | S3  |
| 2. Figure S1.....    | S10 |
| 3. Figure S2.....    | S10 |
| 4. Figure S3.....    | S11 |
| 5. Figure S4.....    | S11 |
| 6. Figure S5.....    | S12 |
| 7. Figure S6.....    | S12 |
| 8. Figure S7.....    | S13 |
| 9. Figure S8.....    | S13 |
| 10. Figure S9.....   | S14 |
| 11. Figure S10.....  | S14 |
| 12. Figure S11.....  | S15 |
| 13. Figure S12.....  | S15 |
| 14. Figure S13.....  | S16 |
| 15. Figure S14.....  | S16 |
| 16. Figure S15.....  | S17 |
| 17. Figure S16.....  | S17 |
| 18. Figure S17.....  | S17 |
| 19. Figure S18.....  | S18 |
| 20. Figure S19.....  | S18 |
| 21. Figure S20.....  | S19 |
| 22. Figure S21.....  | S20 |
| 23. Figure S22.....  | S21 |
| 24. Figure S23.....  | S21 |
| 25. Figure S24.....  | S21 |
| 26. Figure S25.....  | S22 |
| 27. Figure S26.....  | S22 |
| 28. Table            |     |
| S1.....              | S23 |
| 29. Table            |     |
| S2.....              | S23 |
| 30. Reference.....   | S23 |

## Experimental

### Reagents and apparatus:

Thiochro-man-4one, phenyl hydrazine, trimethylsilyl chloride, NaH, iodomethane, trifluoroacetic anhydride (TFAA), 1-bromopropane, 1-iodobutane, 3-chloroperbenzoic acid, iodoethane, sodium thiosulfate and 3-mercaptopropionic acid were obtained from Beijing InnoChem Science & Technology Co., Ltd. N-hydroxysuccinimide (NHS), *N*-(3-Dimethylaminopropyl)-*N'*-ethylcarbodiimide hydrochloride (EDCI), hydrochloride, DMSO-d<sub>6</sub>, bovine serum albumin (BSA), *N,N*-dimethylformamide (DMF), concanavalin A (ConA), ricinus communis agglutinin (RCA<sub>120</sub>), wheat germ agglutinin (WGA) and elderberry (SNA) were obtained from Sigma-Aldrich. NaCl, Na<sub>2</sub>SO<sub>4</sub>, NaHCO<sub>3</sub>, Na<sub>2</sub>CO<sub>3</sub>, ethyl acetate (EtOAc), hexane, ethanol (EtOH), CH<sub>3</sub>CN, and diethyl ether (Et<sub>2</sub>O) were obtained from Beijing Chemicals, Ltd. MCF-7 (breast cancer) cell lines were purchased from the Cell Resource Center, Shanghai Institute for Biological Sciences (Chinese Academy of Sciences, Shanghai, China). MCF-7R (Doxorubicin-resistant MCF-7 subline) cell lines were purchased from Shanghai Aiyuan Biological Technology Co. Ltd. (Shanghai, China). RPMI-1640 medium, 10% fetal bovine serum and 1% penicillin/streptomycin were purchased from Thermo Fisher Scientific Co., Ltd. Ultrapure water (over 18 MΩ·cm) from a Milli-Q reference system (Millipore) was used throughout. The stock solution (1 mM) of probes **1-4** were prepared in DMF.

Matrix-assisted laser desorption/ionization mass spectrometry (MALDI MS) was performed on a Bruker Microflex time-of-flight mass spectrometer (Bruker Daltonics, Bremen, Germany) equipped with a 355 nm and 2 kHz solid state Nd:YAG Smart Beam laser. The mass spectrum was summed up by 400 shots at a laser repetition rate of 1000 Hz and analyzed by flexAnalysis (Bruker Daltonics, Germany). <sup>1</sup>H-NMR and <sup>13</sup>C-NMR spectra were measured with a Bruker DMX-400 spectrometer. Diffusion-ordered NMR spectroscopy was recorded with a Bruker DMX-600 spectrometer. Fluorescence imaging was conducted on an FV 1000-IX81 confocal laser scanning microscope (Olympus, Japan). Absorption spectra were made by microplate reader (Molecular Devices SpectraMax i3). The fluorescence intensity of cells was determined by a Becton Dickinson FACScalibur flow cytometer (Becton Dickinson, USA). Circular dichroism was measured by J-815 Circular dichroism spectrometer (JASCO, Japan).

## Syntheses of probes

Probes **1-4** were prepared according to the reported literature. <sup>[1]</sup>

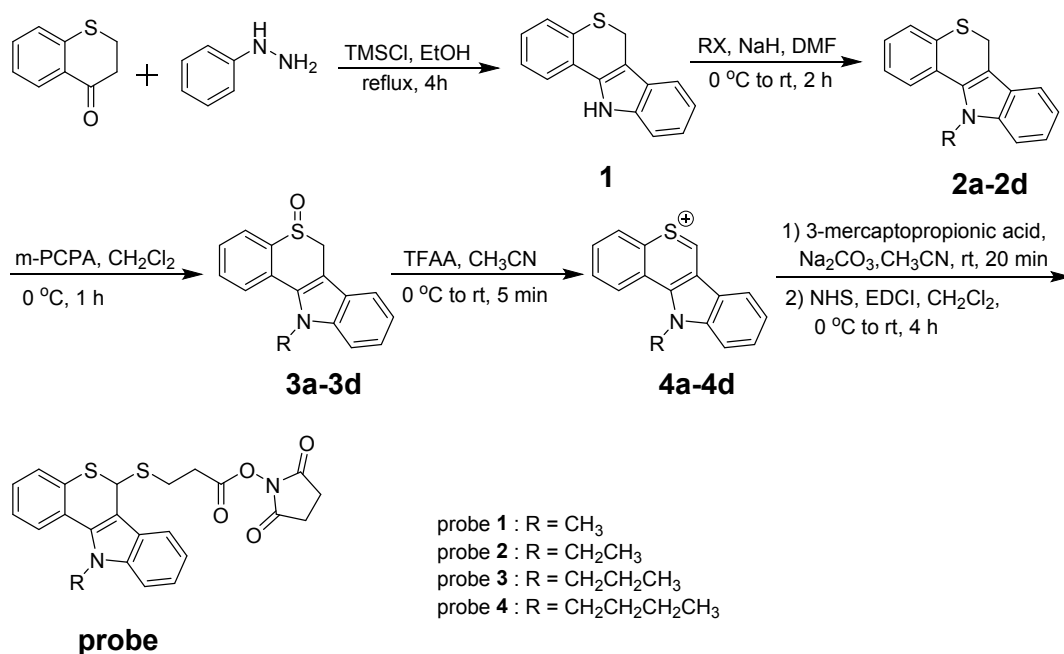

**Scheme S1.** The illustration of synthetic route of probes **1-4**.

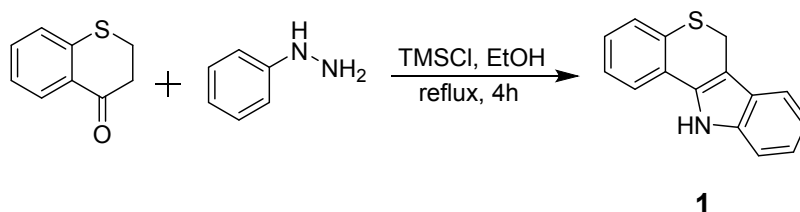

**1**: Thiochroman-4-one (0.822 g, 5 mmol) was placed round bottom flask with EtOH (10 mL), phenylhydrazine (0.541 g, 5 mmol) and trimethylsilyl chloride (0.543 g, 5 mmol) were added to the solution, respectively. The reaction mixture was heated to reflux for 4 h. After completing it, the solution was basified with saturated NaHCO<sub>3</sub> solution and diluted with CH<sub>2</sub>Cl<sub>2</sub> (10 mL). The organic layer was separated and the aqueous solution was washed with 10 mL CH<sub>2</sub>Cl<sub>2</sub> twice. The totally collected organic solvent was dried over anhydrous Na<sub>2</sub>SO<sub>4</sub>. The solvent was removed by evaporation under reduced pressure, and the residue was subjected to silica gel chromatography with eluent (EtOAc: hexane, v/v, 1:20 to 1:5), affording **1** as a white solid (1.067 g, 90%).

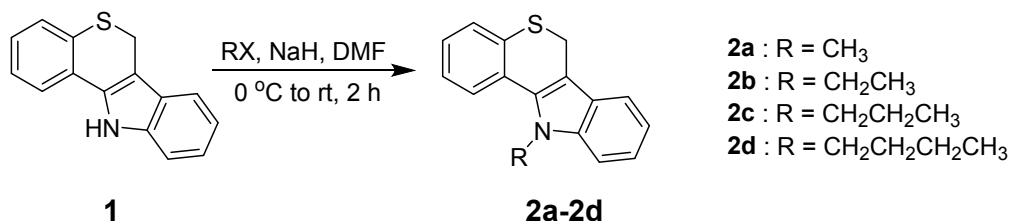

**2a-2d**: The mixture of (**1**, 1.42 g, 6 mmol) and NaH (0.530 g, 12 mmol) in anhydrous DMF (15 mL) was stirred for 30 min at 0 °C under N<sub>2</sub>. Then, alkyl halide (12 mmol) was added to the solution, and the reaction mixture was stirred at RT for 2 h. Subsequently, H<sub>2</sub>O (10 mL) and CH<sub>2</sub>Cl<sub>2</sub> (40 mL) were sequentially added to the solution. The organic layer was collected and dried over anhydrous Na<sub>2</sub>SO<sub>4</sub>. The solvent was removed by evaporation, and the residue was subjected to silica gel chromatography eluted with EtOAc: hexane (v/v, 1:20), obtaining **2a-2d** as a white solid, which was used without purification.

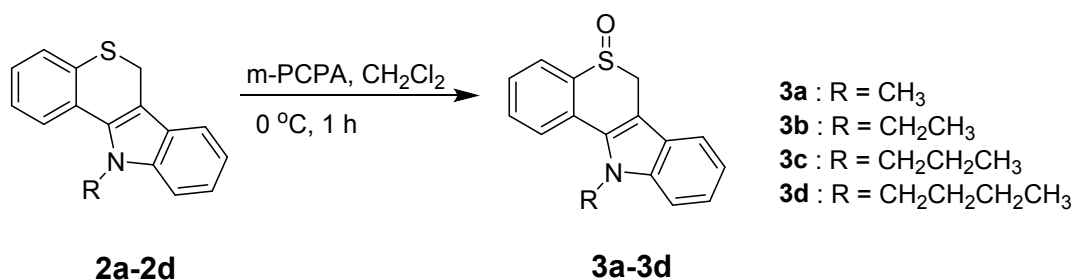

**3a-3d**: (**2a-2d**, 1.0 equiv) was dissolved in anhydrous CH<sub>2</sub>Cl<sub>2</sub>, and 3-chloroperbenzoic acid (69%, 1.1 equiv) was added to the solution at 0 °C. The mixture was stirred for 1h, and then, 20% sodium thiosulfate aqueous solution was added to the solution to quench the reaction. The organic layer was collected and dried over anhydrous Na<sub>2</sub>SO<sub>4</sub>. The solvent was removed by evaporation, and the residue was purified using silica gel chromatography with EtOAc: hexane (v/v, 1:1) as eluent, was obtained **3a-3d** as a yellow solid, which was used without purification.

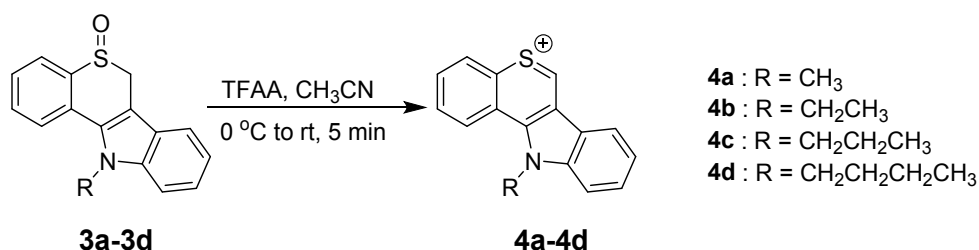

**4a-4d**: (**3a-3d**, 1.0 equiv) and TFAA (3.0 equiv) were dissolved in CH<sub>3</sub>CN at 0 °C under N<sub>2</sub>. The mixture was stirred for 5 min, and then the deep yellow solution was concentrated by evaporation, and the crude product was precipitated in Et<sub>2</sub>O at 0 °C.

The resulting yellow solid was filtered, washed with cold anhydrous Et<sub>2</sub>O, and dried under reduced pressure to give the thionium salt **4a-4d** as a deep yellow solid, which was used without further purification.

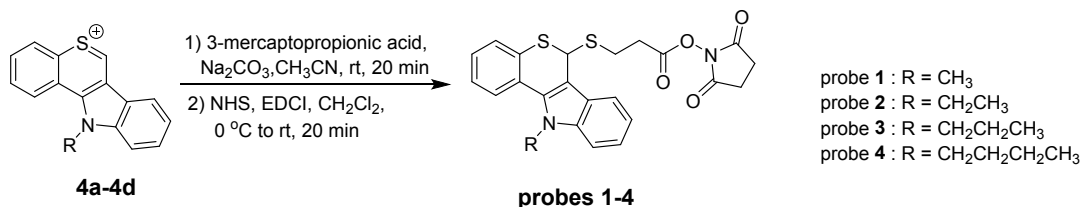

Thionium salt (**4a-4d**, 1.0 equiv), 3-mercaptopropionic acid (1.0 equiv), and  $\text{Na}_2\text{CO}_3$  (1.0 equiv) was dissolved in  $\text{CH}_3\text{CN}$ , and then the mixture was stirred at RT until solution turns to colorless and diluted with  $\text{CH}_2\text{Cl}_2$ .  $\text{H}_2\text{O}$  was added to the mixture until all the solid was dissolved. Subsequently, the organic layer was collected and washed with saturated  $\text{NH}_4\text{Cl}$  aqueous solution. The organic solution was dried over anhydrous  $\text{Na}_2\text{SO}_4$ , and the solvent was evaporated under reduced pressure. The resulting solid was used without further purification.

A mixture of the crude carboxylic acid and N-hydroxysuccinimide (NHS) (1.1 equiv) was dissolved in anhydrous  $\text{CH}_2\text{Cl}_2$ , followed by the addition of EDCI (3.0 equiv) in  $\text{CH}_2\text{Cl}_2$  via cannula at 0 °C under  $\text{N}_2$ . The resulting solution was stirred at RT for 4 h. After that, the solution was diluted with  $\text{CH}_2\text{Cl}_2$  and washed twice with  $\text{H}_2\text{O}$ . The collected organic solution was dried over anhydrous  $\text{Na}_2\text{SO}_4$ . The solvent was evaporated under reduced pressure and the residue was purified using silica gel chromatography with EtOAc: hexane (v/v, 1:1) as eluent, obtaining **probes 1-4** as a white solid.

**Probe 1:** Yield 51%. The <sup>1</sup>H-NMR and <sup>13</sup>C-NMR spectra of probe **1** are shown below in Figures S1 and S2, respectively. <sup>1</sup>H-NMR (400 MHz, 298 K,  $\text{DMSO-d}_6$ ):  $\delta$  7.98 (d, J=7.7 Hz, 1H), 7.72 (d, J=7.9 Hz, 1H), 7.60 (d, J=7.8 Hz, 1H), 7.57 (d, J=8.3 Hz, 1H), 7.43 (dd, J=7.7, 7.6 Hz, 1H), 7.35 (dd, J=6.9, 7.5 Hz, 1H), 7.29 (dd, J=7.2, 7.5 Hz, 1H), 7.17 (dd, J=7.6, 7.2 Hz, 1H), 6.23 (s, 1H), 4.00 (s, 3H), 3.24-3.09 (m, 2H), 3.03-2.96 (m, 1H), 2.89-2.75 (m, 5H). <sup>13</sup>C-NMR (100 MHz, 298 K,  $\text{DMSO-d}_6$ ):  $\delta$  170.0, 167.7, 138.1, 134.5, 130.3, 129.5, 127.4, 126.6, 126.5, 124.9, 122.8, 122.6, 120.0, 118.5, 110.6, 110.2, 42.8, 32.8, 31.3, 25.6, 25.3.

**Probe 2:** Yield 45%. The <sup>1</sup>H-NMR and <sup>13</sup>C-NMR spectra of probe **2** are shown below in Figures S3 and S4, respectively. <sup>1</sup>H-NMR (400 MHz, 298K,  $\text{DMSO-d}_6$ ):  $\delta$  7.82 (d, J=7.7 Hz, 1H), 7.72 (d, J=7.9 Hz, 1H), 7.61 (t, J=7.5 Hz, 2H), 7.46 (dd, J=6.7,

7.6 Hz, 1H), 7.35 (dd, J=7.6, 7.3 Hz, 1H), 7.29 (dd, J=7.8, 7.5 Hz, 1H), 7.18 (dd, J=7.6, 7.2 Hz, 1H), 6.22 (s, 1H), 4.47 (q, J=6.8 Hz, 2H), 3.23-3.08 (m, 2H), 3.05-2.96 (m, 1H), 2.82-2.76 (m, 5H), 1.42 (t, J=7.1 Hz, 3H). <sup>13</sup>C-NMR (100 MHz, 298 K, DMSO-d<sub>6</sub>): δ 170.6, 168.3, 138.0, 134.4, 131.1, 130.3, 128.1, 127.4, 127.2, 124.9, 123.5, 123.5, 120.8, 119.3, 117.7, 110.9, 43.3, 35.4, 31.9, 26.2, 25.9, 15.9.

Probe 3: Yield 59%. The <sup>1</sup>H-NMR and <sup>13</sup>C-NMR spectra of probe 3 are shown below in Figures S5 and S6, respectively. <sup>1</sup>H-NMR (400 MHz, 298 K, DMSO-d<sub>6</sub>): δ 7.84 (d, J=7.8 Hz, 1H), 7.72 (d, J=7.8 Hz, 1H), 7.60 (t, J=7.8 Hz, 2H), 7.45 (dd, J=6.9, 7.4 Hz, 1H), 7.34 (dd, J=7.5, 7.2 Hz, 1H), 7.28 (dd, J=7.2, 7.5 Hz, 1H), 7.17 (dd, J=7.6, 7.2 Hz, 1H), 6.21 (s, 1H), 4.46-4.31 (m, 2H), 3.23-3.08 (m, 2H), 3.03-2.96 (m, 1H), 2.82-2.75 (m, 5H), 1.85-1.67 (m, 2H), 0.84 (t, J=7.3 Hz, 3H). <sup>13</sup>C-NMR (100 MHz, 298 K, DMSO-d<sub>6</sub>): δ 170.8, 168.3, 138.5, 134.6, 131.0, 130.3, 128.0, 127.4, 127.3, 124.7, 123.5, 123.4, 120.7, 119.3, 112.0, 111.1, 46.7, 43.3, 32.0, 26.3, 26.0, 23.6, 11.4.

Probe 4: Yield 50%. The <sup>1</sup>H-NMR and <sup>13</sup>C-NMR spectra of probe 4 are shown below in Figures S7 and S8, respectively. <sup>1</sup>H-NMR (400 MHz, 298 K, DMSO-d<sub>6</sub>): δ 7.85 (d, J=7.8 Hz, 1H), 7.73 (d, J=7.7 Hz, 1H), 7.60 (t, J= 8.1 Hz, 2H), 7.44 (dd, J=7.3, 7.0 Hz, 1H), 7.33 (dd, J=7.5, 7.5 Hz, 1H), 7.28 (dd, J=7.3, 7.9 Hz, 1H), 7.17 (dd, J=7.8, 7.2 Hz, 1H), 6.21 (s, 1H), 4.48-4.34 (m, 2H), 3.24-3.09 (m, 2H), 3.04-2.97 (m, 1H), 2.90-2.76 (m, 5H), 1.81-1.62 (m, 2H), 1.30-1.16 (m, 2H), 0.87 (t, J=7.3 Hz, 3H). <sup>13</sup>C-NMR (100 MHz, 298 K, DMSO-d<sub>6</sub>): δ 170.6, 168.3, 138.4, 134.7, 131.0, 130.3, 128.0, 127.4, 127.2, 124.8, 123.5, 120.8, 119.3, 112.0, 111.1, 45.0, 43.4, 32.3, 32.0, 26.3, 26.0, 19.8, 14.0.

### Lectin-probes conjugation

Lectins including ConA, RCA<sub>120</sub>, WGA and SNA were first dissolved in PBS (pH 7.4) at a concentration of 0.2 mg/mL. 50 μL, 20 μmol/mL probes 1-4 was added to the lectin solution respectively, and incubated at room temperature for 3 h in dark. Using a 10 KD Ultra Centrifugal Filter (Merck Millipore, Germany), excess probes were removed and solution was buffer exchanged to PBS (pH 7.4) to make the ConA-probe1, RCA<sub>120</sub>-probe2, WGA-probe3 and SNA-probe4 conjugate, respectively. Protein concentration was determined using Bradford protein assay kit (Solarbio, Beijing).

### Cell culture

MCF-7 cells and MCF-7R cells were cultured in RPMI 1640 medium supplied with 10% fetal bovine serum and 1% penicillin/streptomycin at 37 °C in a humidified atmosphere of 5% CO<sub>2</sub>.

### **Confocal Microscopy Imaging**

MCF-7 cells and MCF-7R cells were seeded at desired concentrations in covered glass-bottomed cell confocal dishes. After cultured for at least 24 h, the cells were washed three times by PBS and stained by FITC-labeled ConA-probe1 for 30 min. After removing excess FITC-labeled ConA-probe1 by washing with PBS, cells were imaged with a laser scanning confocal microscope.

### **Monosaccharide inhibition assay**

1 µg/mL FITC-labeled ConA-probe1 was pre-incubated with 1 mg/mL free monosaccharides ( $\alpha$ -methyl-mannoside,  $\alpha$ -methyl-glucoside and D-galactose) respectively at 37 °C for 1 h. After the removal of excess monosaccharides by 10KD Ultra Centrifugal Filter, the conjugates were incubated with MCF-7 cells at 37 °C for 30min. The cell suspension was centrifuged at 1000 rpm for 5 min, washed twice, resuspended in PBS buffer and filtered by 400-mesh sieve. The fluorescence intensity of cells was determined by a Becton Dickinson FACScalibur flow cytometer. For each flow cytometric test sample, 10,000 events were acquired, and the mean fluorescence intensity was used for analysis.

### **Tunicamycin treatment**

MCF-7 cells were cultured in cell culture medium in the absence and presence of tunicamycin of different concentration (20 µg/mL, 50 µg/mL, 100 µg/mL, 200 µg/mL) for 24 h.

LDI-MS analysis: cells were trypsinized and incubated with ConA-probe1 for 40 min. After washing three times with PBS buffer, cells were directly analyzed by LDI-MS.

**Flow cytometry analysis:** cells were trypsinized and incubated with FITC-labeled ConA-probe1 at 37 °C for 30min. The cell suspension was centrifuged at 1000 rpm for 5 min, washed twice, resuspended in PBS buffer and filtered by 400-mesh sieve. The fluorescence intensity of cells was determined by a Becton Dickinson FACS calibur flow cytometer. For each flow cytometric test sample, 10,000 events were acquired, and the mean fluorescence intensity was used for analysis.



**Viability assay:** Cells were seeded in 96-well plate and cultured for 24 h. After washing with PBS, cells were incubated with different concentration of tunicamycin (0, 1, 10, 50, 75, 100  $\mu\text{g}/\text{mL}$ ) for 24 h. 10  $\mu\text{L}$  CCK-8 (Cell Counting Kit-8) reagent was added into each well with 100  $\mu\text{L}$  cell culture medium inside. Absorbance at 450 nm was measured by a microplate reader after 1 h incubation.

### **LDI-MS analysis**

MCF-7 cells and MCF-7R cells were seeded at desired concentrations and trypsinized. Lectin-probe was added and incubated with cells at 37  $^{\circ}\text{C}$  for 30min. After washing three times with PBS buffer, cells were directly analyzed by LDI-MS.

### **Single cell analysis**

MCF-7 cells and MCF-7R cells were seeded on the indium tin oxide (ITO)-coated glass slides at desired concentrations for 24 h. To reduce cell-to-cell contamination during MS analysis, cells were  $\geq 20$   $\mu\text{m}$  (two-fold greater than the diameter of the laser probe) away from other cells. Lectin-probe was added and incubated with cells at 37  $^{\circ}\text{C}$  for 30min. After washing three times with PBS buffer, cells were imaged by a laser scanning confocal microscope, then analyzed by LDI-MS. The “small” ( $\sim 10$   $\mu\text{m}$  footprint) laser setting was used and 400 laser shots were accumulated at 1000 Hz and 20% laser energy for each cell. After MS analysis, the optical imaging was performed to confirm single cell was analyzed by one laser shot.

### **LDI imaging mass spectrometry**

Human breast tissue was provided by the Peking University Third Hospital. Fresh-frozen tissue was cut at 10  $\mu\text{m}$  using a Leica CM1950 cryostat (Leica Microsystems GmbH, Wetzlar, Germany) at -20  $^{\circ}\text{C}$  and thaw mounted onto indium tin oxide (ITO) coated glass slide. The certain amount of lectin-probe conjugates was added to the surface of tissues and incubated at 37  $^{\circ}\text{C}$  for an hour. Then, tissues were gently washed by PBS buffer, and the glass slides were placed into a vacuum desiccator for approximately 30 minutes before LDI-MS analysis.

## Supplementary Figures:

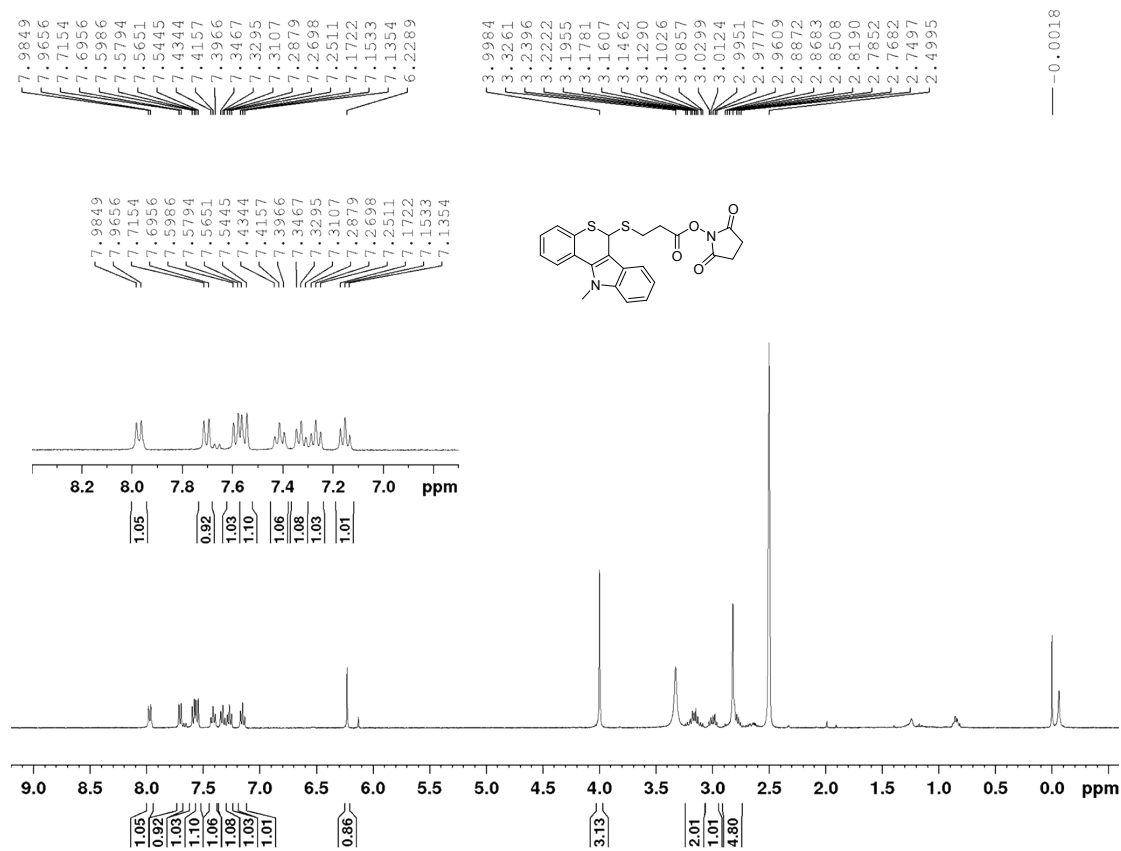

**Figure S1.** <sup>1</sup>H-NMR spectrum of probe 1 (400 MHz, 298 K, DMSO-d<sub>6</sub>).

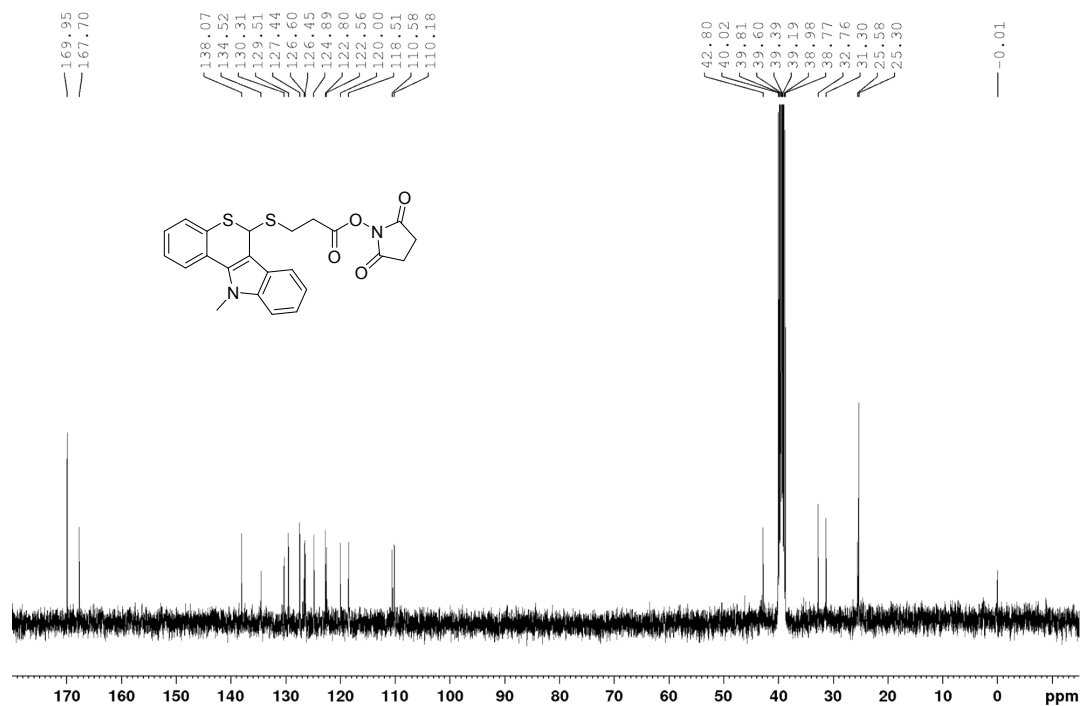

**Figure S2.** <sup>13</sup>C-NMR spectrum of probe 1 (100 MHz, 298 K, DMSO-d<sub>6</sub>).

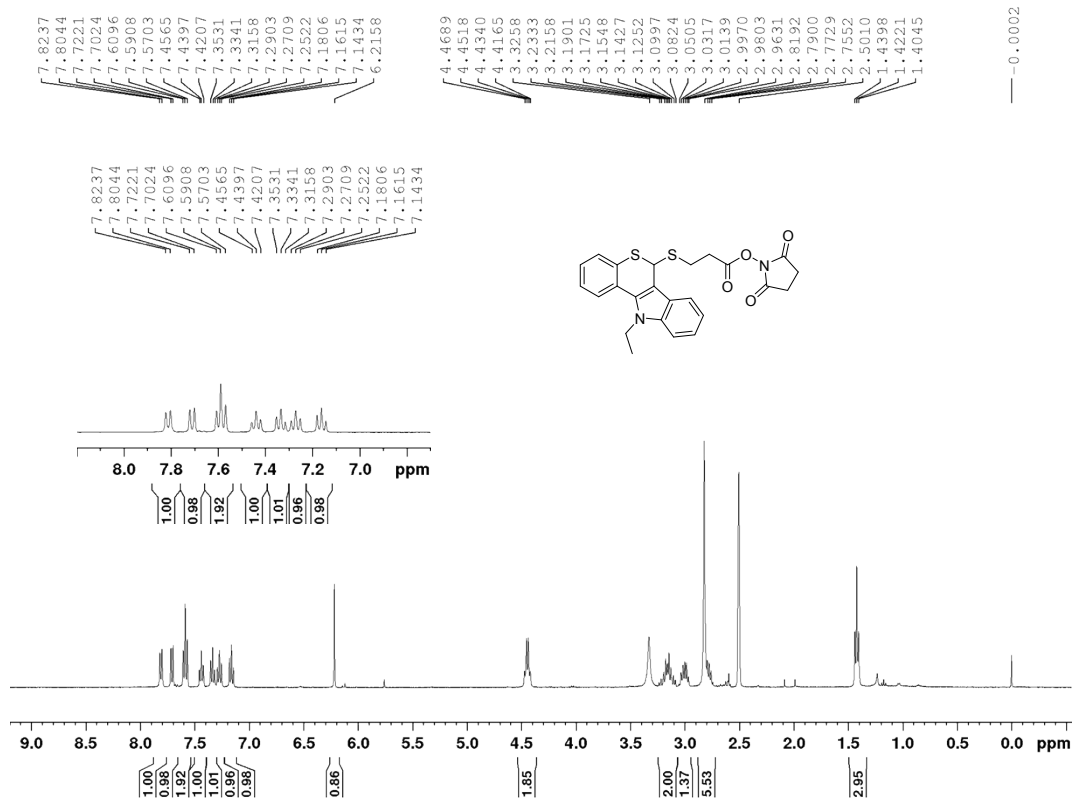

**Figure S3.** <sup>1</sup>H-NMR spectrum of probe 2 (400 MHz, 298 K, DMSO-d<sub>6</sub>).

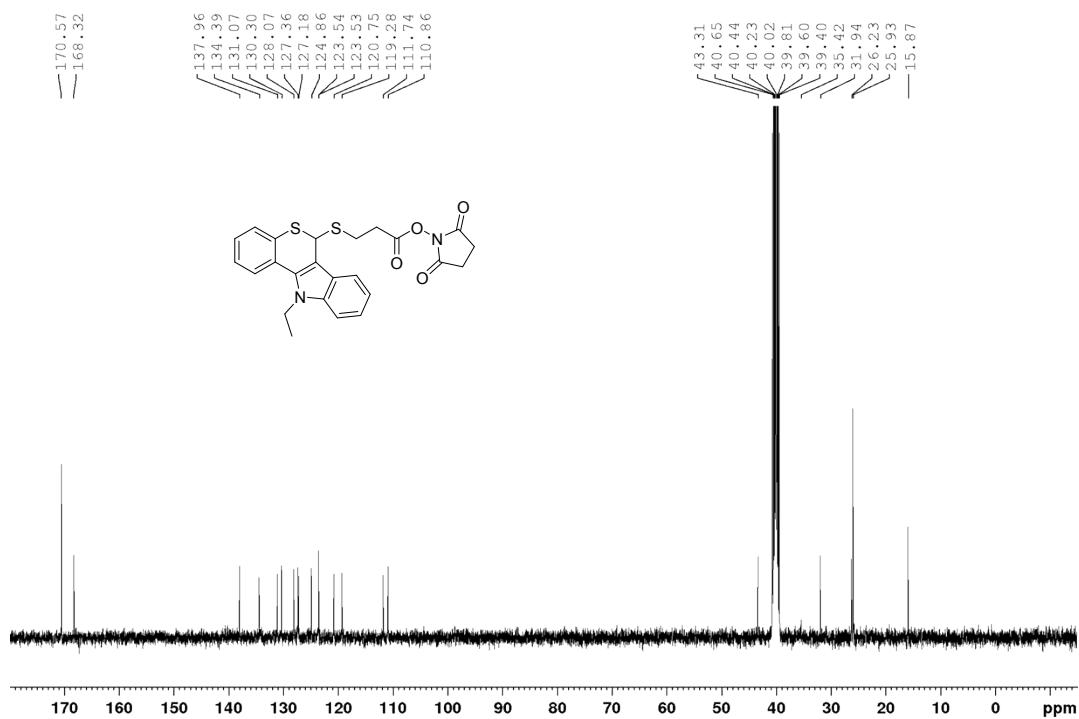

**Figure S4.** <sup>13</sup>C-NMR spectrum of probe 2 (100 MHz, 298 K, DMSO-d<sub>6</sub>).

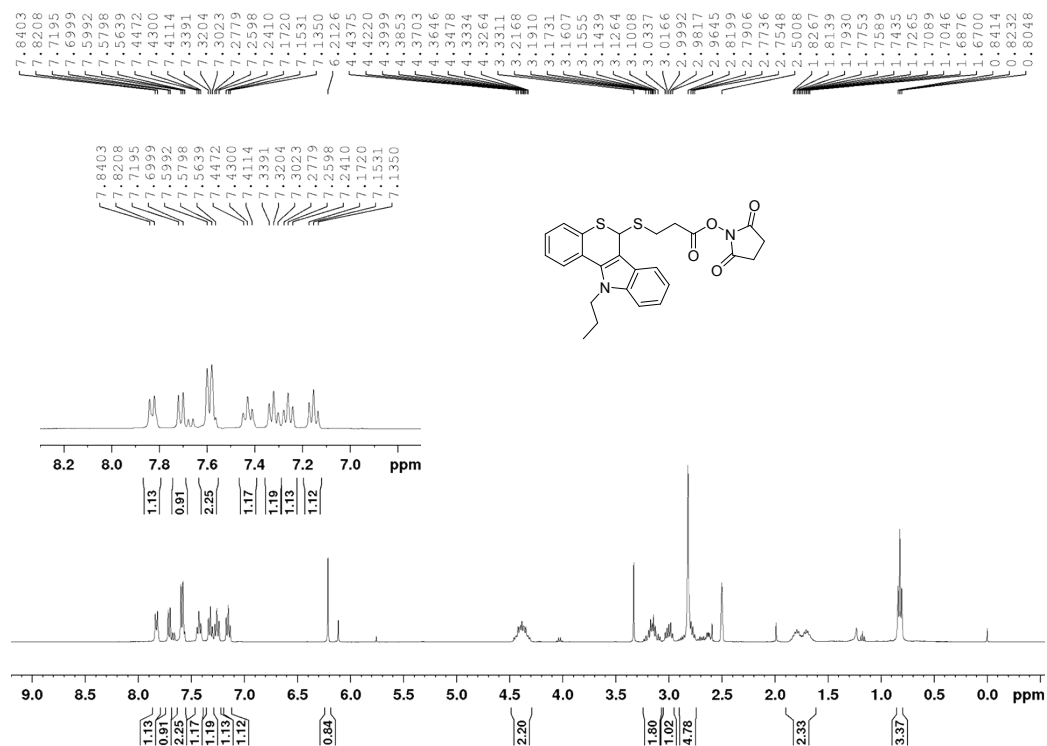

**Figure S5.** <sup>1</sup>H-NMR spectrum of probe **3** (400 MHz, 298 K, DMSO-d<sub>6</sub>).

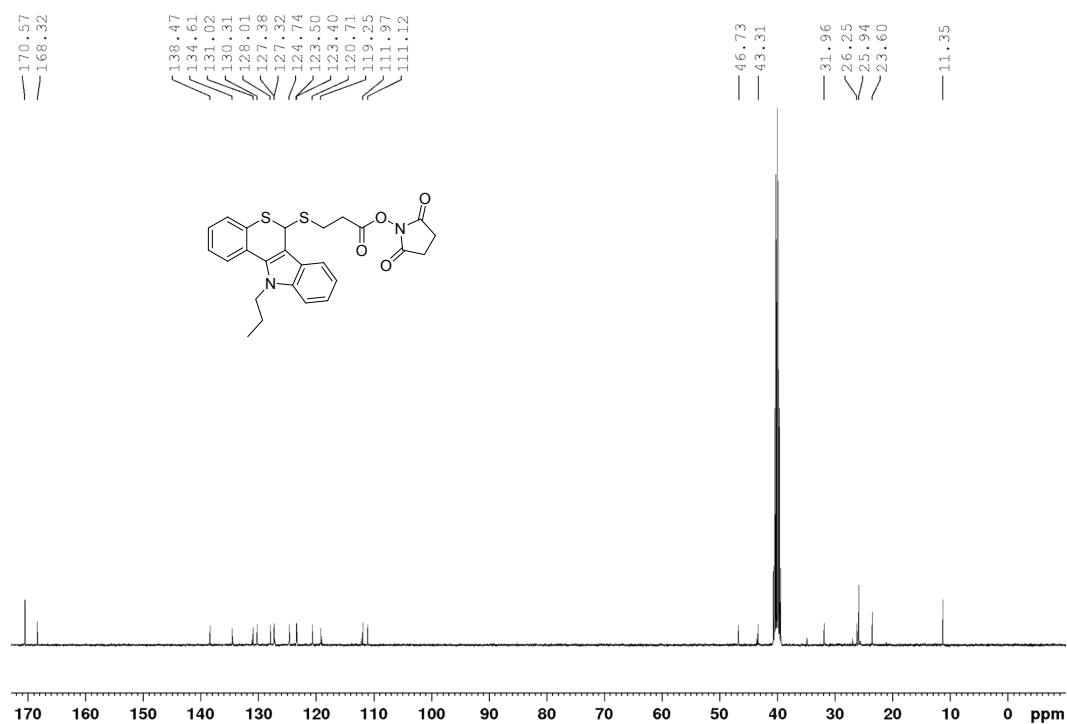

**Figure S6.** <sup>13</sup>C-NMR spectrum of probe **3** (100 MHz, 298 K, DMSO-d<sub>6</sub>).

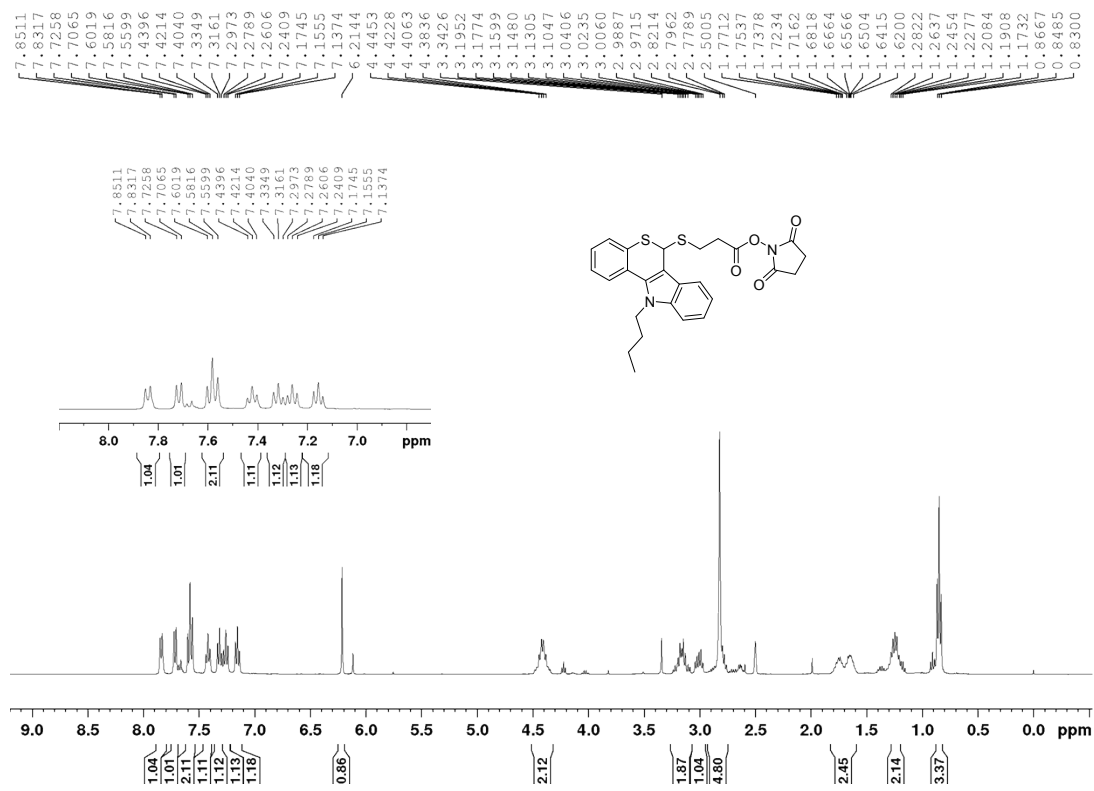

Figure S7. <sup>1</sup>H-NMR spectrum of probe 4 (400 MHz, 298 K, DMSO-d<sub>6</sub>).

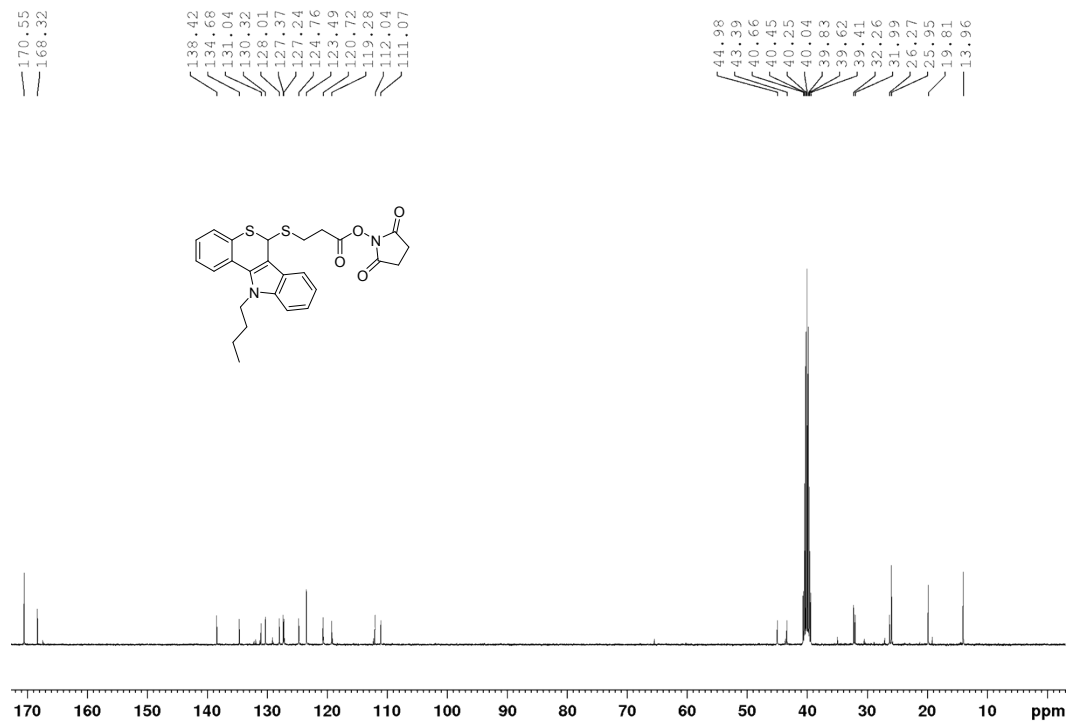

Figure S8. <sup>13</sup>C-NMR spectrum of probe 4 (100 MHz, 298 K, DMSO-d<sub>6</sub>).

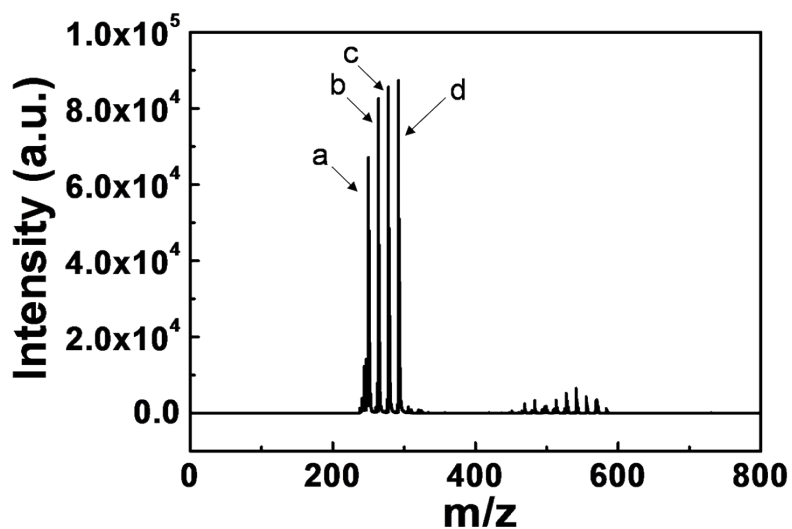

**Figure S9.** LDI-MS spectrum of mixture of an equal molar of probes **1-4**. a: probe **1**; b: probe **2**; c: probe **3**; d: probe **4**.

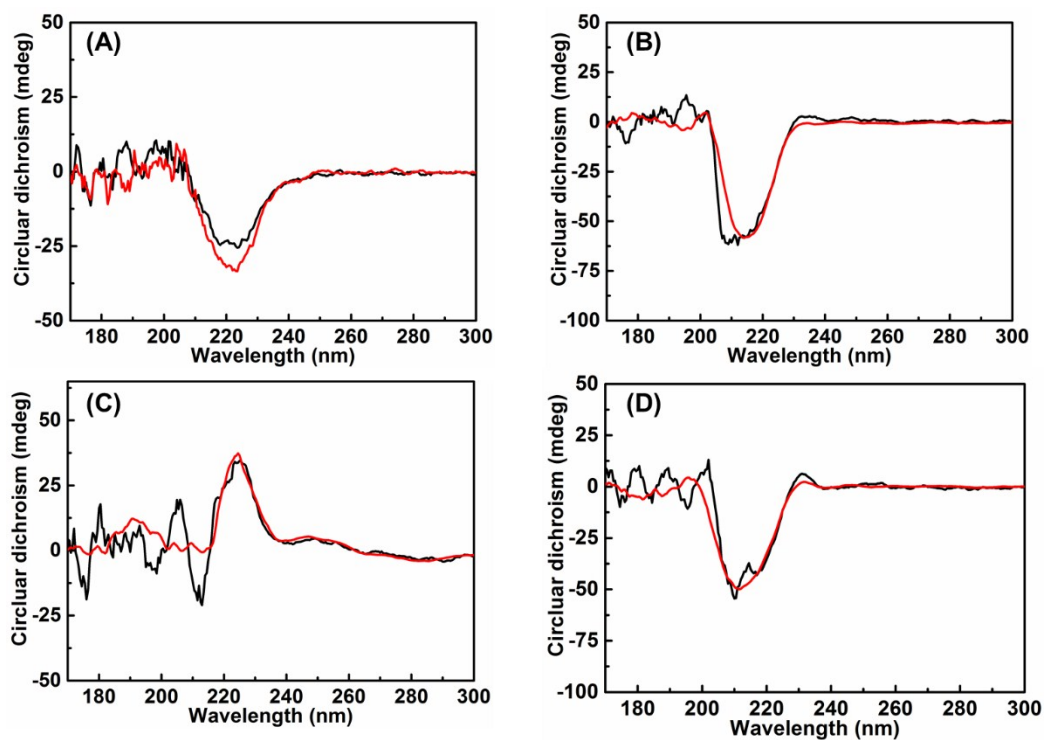

**Figure S10.** Circular dichroism of four lectins (red line), including concanavalin A (ConA), ricinus communis agglutinin (RCA<sub>120</sub>), wheat germ agglutinin (WGA) and elderberry (SNA), and lectin-probes (black line), respectively .

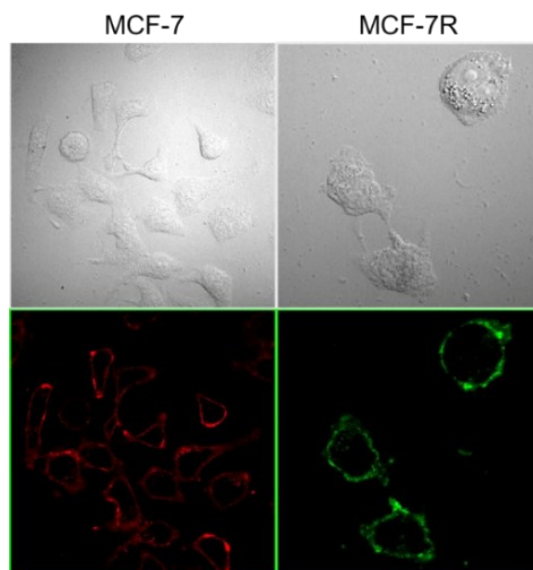

**Figure S11.** Confocal fluorescence images of MCF-7 and MCF-7R cells, which were incubated with FITC-labeled ConA-probe1 for 40 min, respectively.

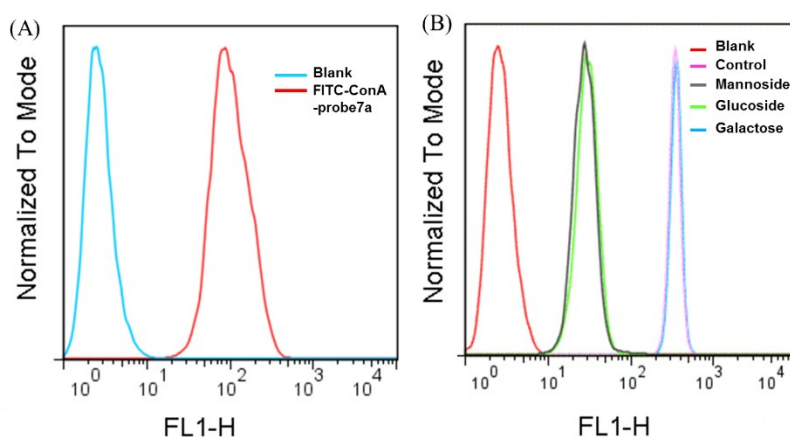

**Figure S12.** (A) Flow cytometry analysis shows the binding of FITC-labeled ConA-probe1 (red) and untreated cells are shown in blue for comparison. (B) Monosaccharide inhibition assay. Flow cytometry analysis of FITC fluorescence in cells. Cells were incubated with FITC-labeled ConA-probe1 pretreated by free monosaccharides ( $\alpha$ -methyl-mannoside,  $\alpha$ -methyl-glucoside and D-galactose).

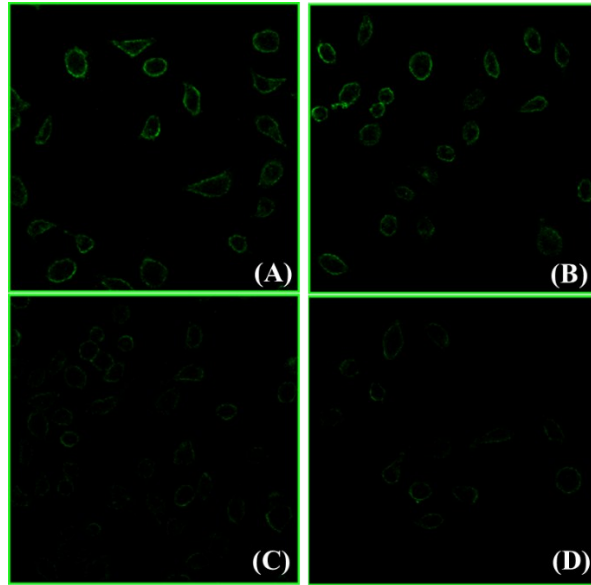

**Figure S13.** Confocal fluorescence images of MCF-7, which were incubated with FITC-labeled ConA-probe1 pretreated by free monosaccharides (B) D-galactose, (C)  $\alpha$ -methyl-mannoside, (D) $\alpha$ -methyl-glucoside and without pretreated (A).

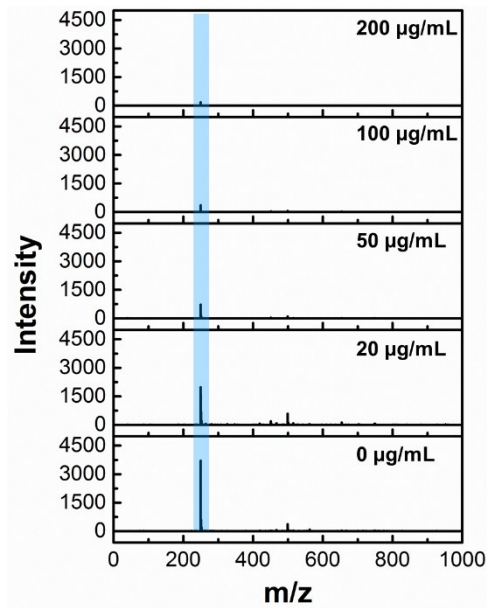

**Figure S14.** MS spectra of the amounts of  $\alpha$ -mannosyl groups in cells under the stimuli of tunicamycin at different concentration.



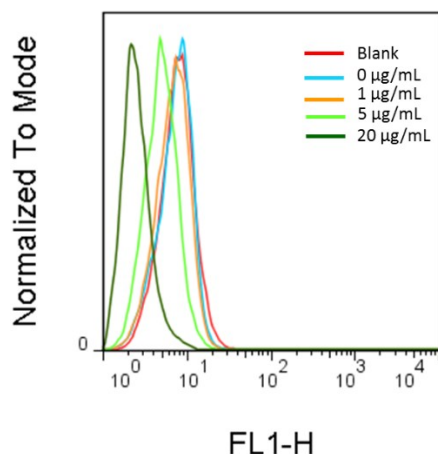

**Figure S15.** Flow cytometry analysis of expression of the  $\alpha$ -mannosyl groups in cells under the stimuli of tunicamycin at different concentration.

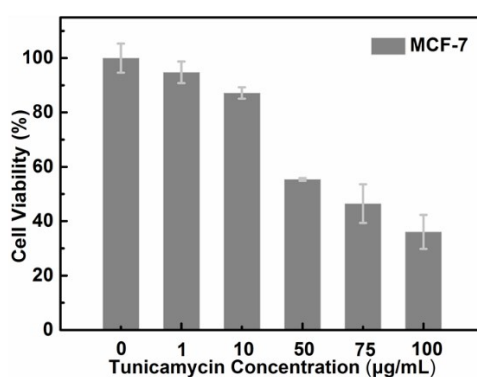

**Figure S16.** Effects of tunicamycin at varied concentrations on the viability of MCF-7 cells. The results are expressed as the mean  $\pm$  SD (n = 5).

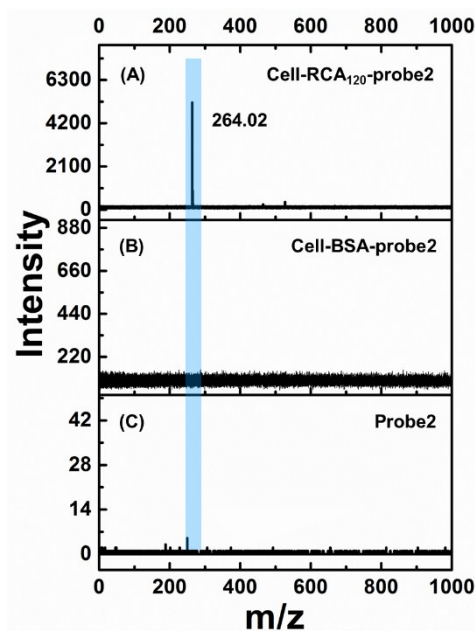

**Figure S17.** LDI-TOF MS analysis of the cell surface glycans based on laser cleavable probes. Mass spectrum of MCF-7 cells labeled by (A) RCA<sub>120</sub>-probe2, (B) BSA-probe2 and (C) probe2.

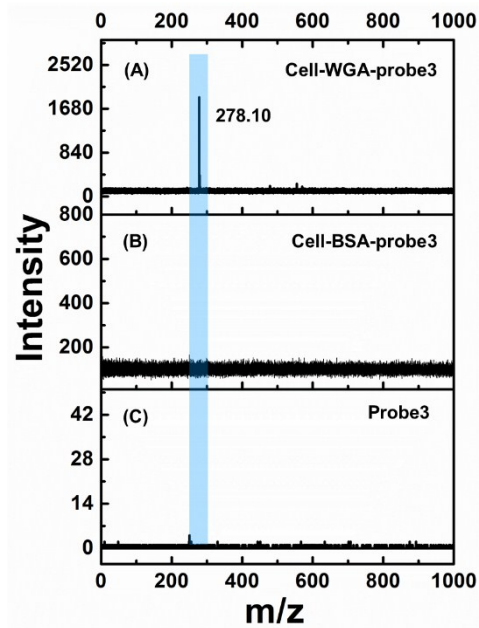

**Figure S18.** LDI-TOF MS analysis of the cell surface glycans based on laser cleavable probes. Mass spectrum of MCF-7 cells labeled by (A) WGA-probe3, (B) BSA-probe3 and (C) probe3.

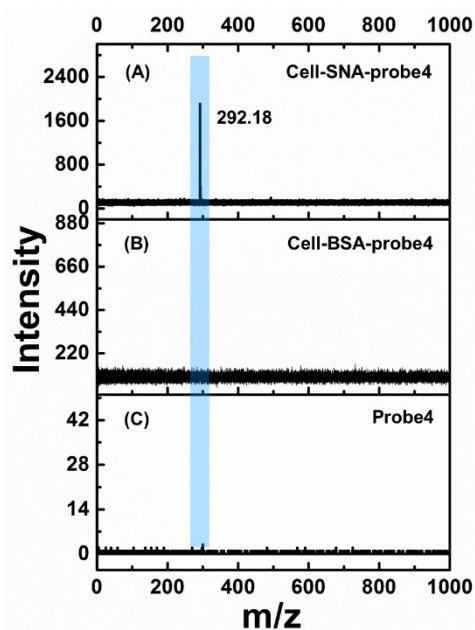

**Figure S19.** LDI-TOF MS analysis of the cell surface glycans based on laser cleavable probes. Mass spectrum of MCF-7 cells labeled by (A) SNA-probe4, (B) BSA-probe4 and (C) probe4.

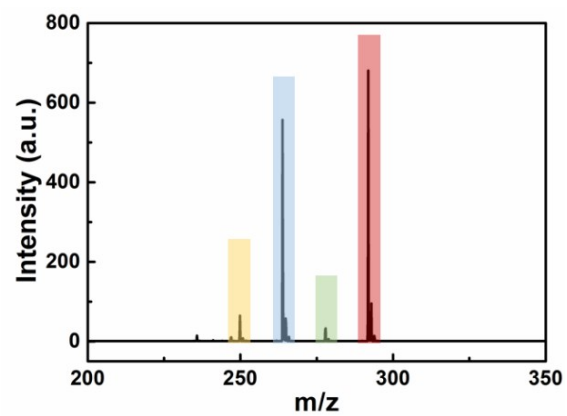

**Figure S20.** LDI-MS analysis of the cell surface glycans based on laser cleavable probes. Mass spectrum of MCF-7R cells labelled by the equal molar mixture of four lectin-probes.

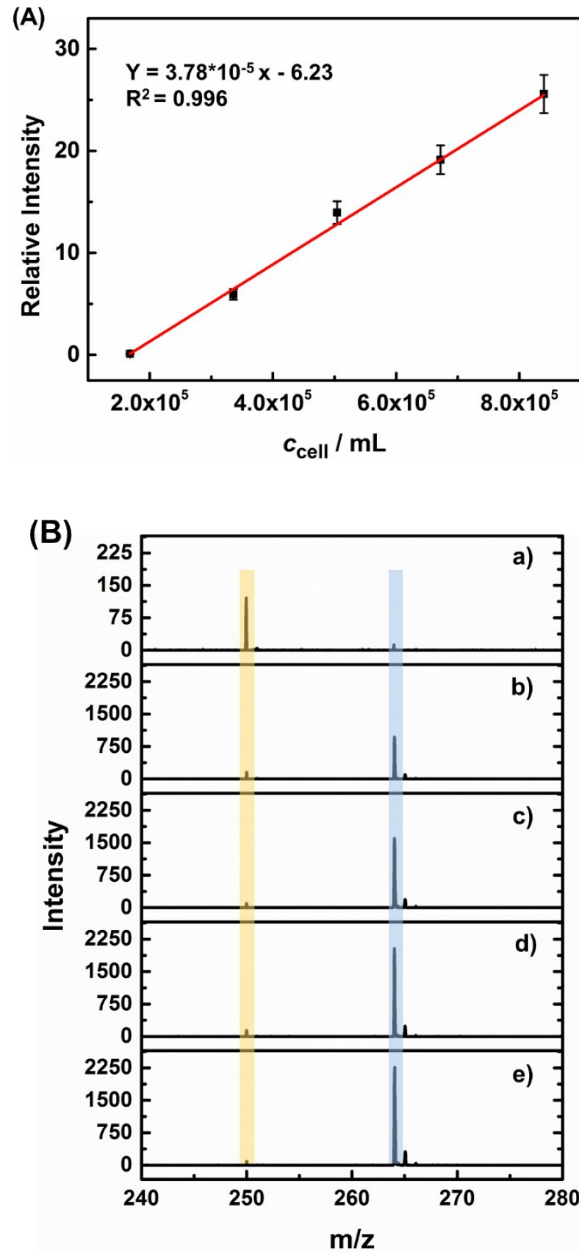

**Figure S21.** (A) Linear calibration curve of cell concentration. (B) LDI-MS analysis of cell precipitation at different concentration: a)  $1.68 \times 10^5$  cells/mL, b)  $3.36 \times 10^5$  cells/mL, c)  $5.04 \times 10^5$  cells/mL, d)  $6.72 \times 10^5$  cells/mL, e)  $8.40 \times 10^5$  cells/mL. 100  $\mu\text{L}$  cell suspensions were added in the experiment. Peak in orange color refers to internal standard ConA-probe1, and peak in blue refers to RCA<sub>120</sub>-probe2.

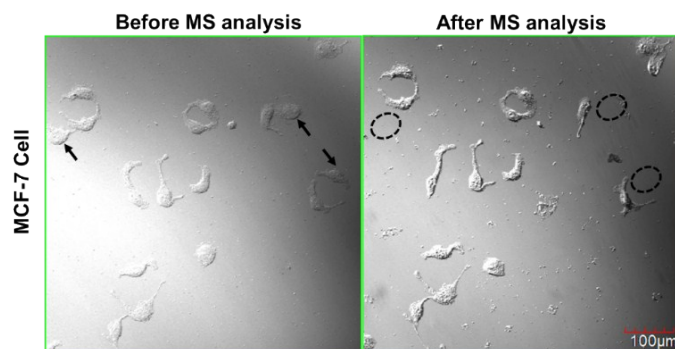

**Figure S22.** The optical imaging of MCF-7 cell before and after LDI-MS analysis. The arrows and circles indicate single cell disappeared during one shot laser by LDI-MS. Scale bar = 100  $\mu\text{m}$ .

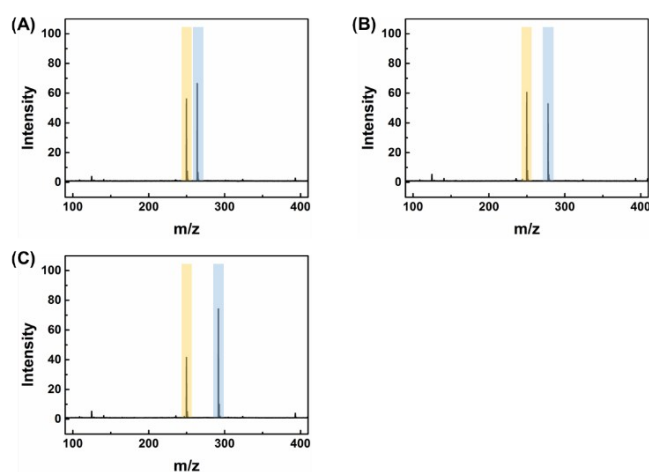

**Figure S23.** LDI-MS analysis of cell lysate with the equal molar mixture of (A) ConA-probe1 and RCA<sub>120</sub>-probe2, (B) ConA-probe1 and WGA-probe3 and (C) ConA-probe1 and SNA-probe4.

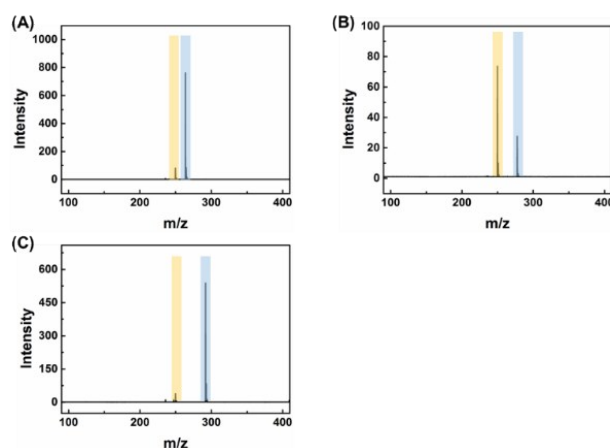

**Figure S24.** LDI-MS analysis of A) ConA-probe1 and RCA<sub>120</sub>-probe2, (B) ConA-probe1 and WGA-probe2 and (C) ConA-probe1 and SNA-probe4 on the surface of MCF-7 cell.

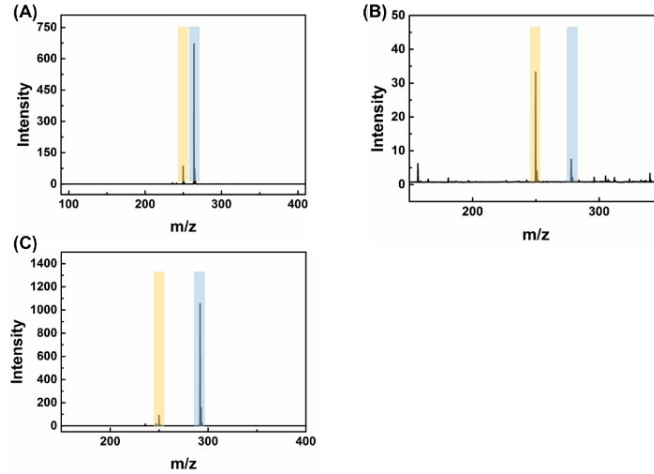

**Figure S25.** LDI-MS analysis of A) ConA-probe1 and RCA<sub>120</sub>-probe2, (B) ConA-probe1 and WGA-probe3 and (C) ConA-probe1 and SNA-probe4 on the surface of MCF-7R cell.

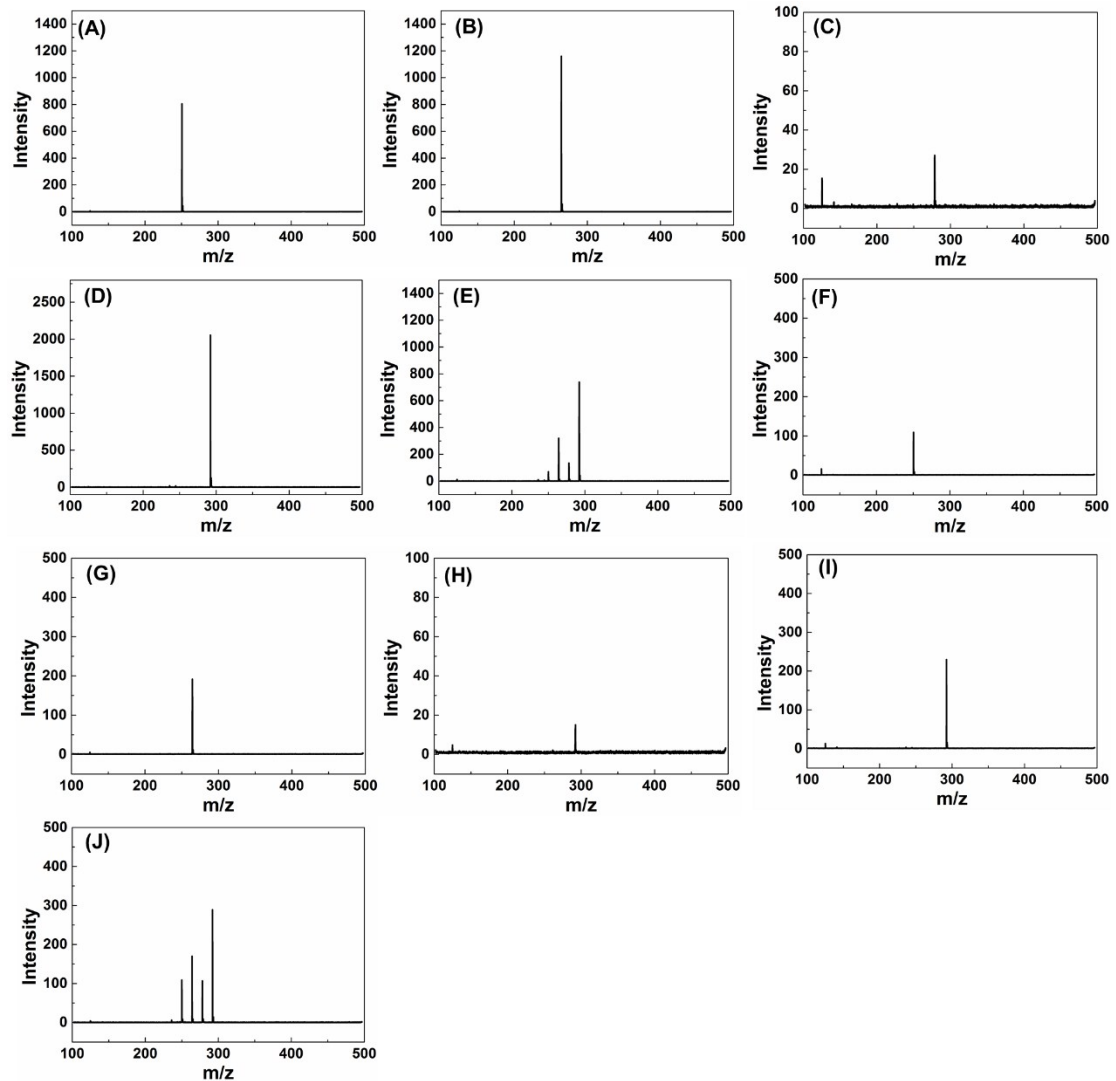

**Figure S26.** Average mass spectrum of the cancerous and paracancerous tissue, which were labeled by ConA-probe1 (A and F), RCA<sub>120</sub>-probe2 (B and G), WGA-probe3 (C and H), SNA-probe4 (D and I) and an equal molar mixture of lectin-probes (J).

(E and J).

**Table S1.** The diffusion coefficients of four probes and lectin-probes.

|             | Molecular weight/Da | Diffusion Coefficients /( $\times 10^{-10}$ m <sup>2</sup> /s) |
|-------------|---------------------|----------------------------------------------------------------|
| Probe1      | 452.54              | 3.082                                                          |
| ConA-Probe1 | $\approx 102$ k     | 2.316                                                          |
| Probe2      | 466.57              | 3.092                                                          |
| RCA-Probe2  | $\approx 120$ k     | 2.748                                                          |
| Probe3      | 480.60              | 3.050                                                          |
| WGA-Probe3  | $\approx 36$ k      | 2.574                                                          |
| Probe4      | 494.62              | 3.038                                                          |
| SNA-Probe4  | $\approx 140$ k     | 2.747                                                          |

**Table S2.** LDI-MS relative quantification of four types of glycans on the MCF-7 and MCF-7R cells by lectin-probe conjugates.

|                            | RCA <sub>120</sub> /ConA | WGA/ConA        | SNA/ConA         |
|----------------------------|--------------------------|-----------------|------------------|
| control                    | $1.28 \pm 0.23$          | $0.95 \pm 0.25$ | $2.03 \pm 0.39$  |
| ER <sup>[a]</sup> of MCF-7 | $9.59 \pm 2.34$          | $0.36 \pm 0.11$ | $14.83 \pm 4.10$ |
| RR <sup>[b]</sup> of MCF-7 | $7.49 \pm 0.45$          | $0.38 \pm 0.02$ | $7.31 \pm 0.66$  |
| ER of MCF-7R               | $7.57 \pm 2.01$          | $0.47 \pm 0.15$ | $11.62 \pm 3.59$ |
| RR of MCF-7R               | $5.91 \pm 0.53$          | $0.49 \pm 0.03$ | $5.72 \pm 0.69$  |

<sup>[a]</sup> ER is short for Experimental Ratio. <sup>[b]</sup> RR is short for Relative Ratio by correction.

## Reference

1. N. Kang, J. M. Lee, A. Jeon, H. B. Oh, B. Moon, *Tetrahedron*, **2016**, 72, 5612-5619.
